# Supplementary material for: A Simple and Efficient Molecularly Imprinted Electrochemical Sensor for the Selective Determination of Tryptophan
Source: PubMed Central journal article supplement (PMC6680830; doi:10.3390/biom9070294), 2019-07-22
Supplement: biomolecules-09-00294-s001.pdf [file biomolecules-09-00294-s001.pdf]

## **Electronic Supplementary Material**

**Simple and Efficient Molecularly Imprinted  
Electrochemical Sensor for Selective  
Determination of Tryptophan**

**Table S1.** Influence of coexisting substances on the determination of 10  $\mu\text{M}$  Trp

| Coexisting substance | Concentration / mM | Change of peak current / % | Coexisting substance | Concentration / mM | Change of peak current / % |
|----------------------|--------------------|----------------------------|----------------------|--------------------|----------------------------|
| $\text{Na}^+$        | 1.0                | 3.27                       | glycine              | 0.01               | 1.24                       |
| $\text{K}^+$         | 1.0                | -1.65                      | alanine              | 1.0                | 0.84                       |
| $\text{Mg}^{2+}$     | 1.0                | 1.23                       | valine               | 1.0                | 0.54                       |
| $\text{Cu}^{2+}$     | 1.0                | 0.86                       | leucine              | 1.0                | -1.25                      |
| $\text{Ca}^{2+}$     | 1.0                | 0.52                       | isoleucine           | 1.0                | 1.12                       |
| $\text{Al}^{3+}$     | 1.0                | 2.87                       | phenylalanine        | 1.0                | 0.83                       |
| $\text{Pb}^{2+}$     | 1.0                | -1.48                      | histidine            | 1.0                | 0.35                       |
| $\text{Cl}^-$        | 1.0                | 1.52                       | aspartic acid        | 1.0                | 0.97                       |
| $\text{NO}_3^-$      | 1.0                | 2.37                       | glutamic acid        | 1.0                | 1.25                       |
| $\text{SO}_4^{2-}$   | 1.0                | -1.12                      | lysine               | 1.0                | 2.04                       |
| oxalic acid          | 0.1                | 3.46                       | arginine             | 1.0                | 1.16                       |
| citric acid          | 1.0                | -2.75                      | serine               | 1.0                | 0.57                       |
| glucose              | 1.0                | 1.84                       | threonine            | 1.0                | 0.34                       |
| lactic acid          | 1.0                | 2.35                       | cysteine             | 1.0                | 0.31                       |
| tartaric acid        | 1.0                | -1.17                      | proline              | 1.0                | 0.24                       |

**Table S2.** Reusability of MIP/ABPE

| Determination times               | 1     | 2     | 3     | 4     | 5     | 6     | 7     |
|-----------------------------------|-------|-------|-------|-------|-------|-------|-------|
| Peak current / $\mu\text{A}$      | 2.075 | 2.045 | 2.112 | 2.050 | 2.015 | 2.057 | 2.108 |
| Relative standard deviation (RSD) | 1.70% |       |       |       |       |       |       |

**Table S3.** Reproducibility of MIP/ABPE

| Electrode number                  | 1     | 2     | 3     | 4     | 5     | 6     | 7     | 8     |
|-----------------------------------|-------|-------|-------|-------|-------|-------|-------|-------|
| Peak current / $\mu\text{A}$      | 2.048 | 2.171 | 2.265 | 2.017 | 2.190 | 2.035 | 2.148 | 2.187 |
| Relative standard deviation (RSD) | 4.18% |       |       |       |       |       |       |       |

**Table S4.** The storage stability of MIP/ABPE

| Day                          | 1     | 2     | 3     | 4     | 5     | 6     | 7     |
|------------------------------|-------|-------|-------|-------|-------|-------|-------|
| Peak current / $\mu\text{A}$ | 2.065 | 2.153 | 2.049 | 2.127 | 2.036 | 2.064 | 2.083 |
| Day                          | 8     | 9     | 10    | 11    | 12    | 13    | 14    |
| Peak current / $\mu\text{A}$ | 2.051 | 2.024 | 2.017 | 2.029 | 2.018 | 2.014 | 1.987 |
| Day                          | 15    | 16    | 17    | 18    | 19    | 20    |       |
| Peak current / $\mu\text{A}$ | 1.957 | 1.923 | 1.915 | 1.908 | 1.894 | 1.875 |       |
